# Supplementary material for: The ligand-bound state of a G protein-coupled receptor stabilizes the interaction of functional cholesterol molecules
Source: PubMed Central journal article supplement (PMC8050779; doi:10.1016/j.jlr.2021.100059), 2021-02-26

### Supplementary Figure S3: Model of a OXTR dimer within the ICCR complex

A)

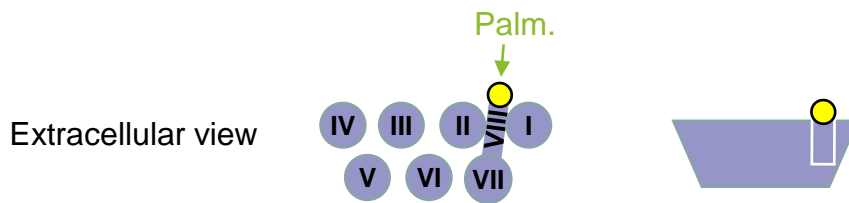

B)

Interface between helices:  
I-II / IV-VI

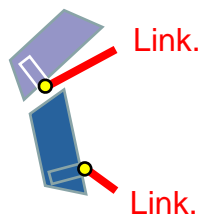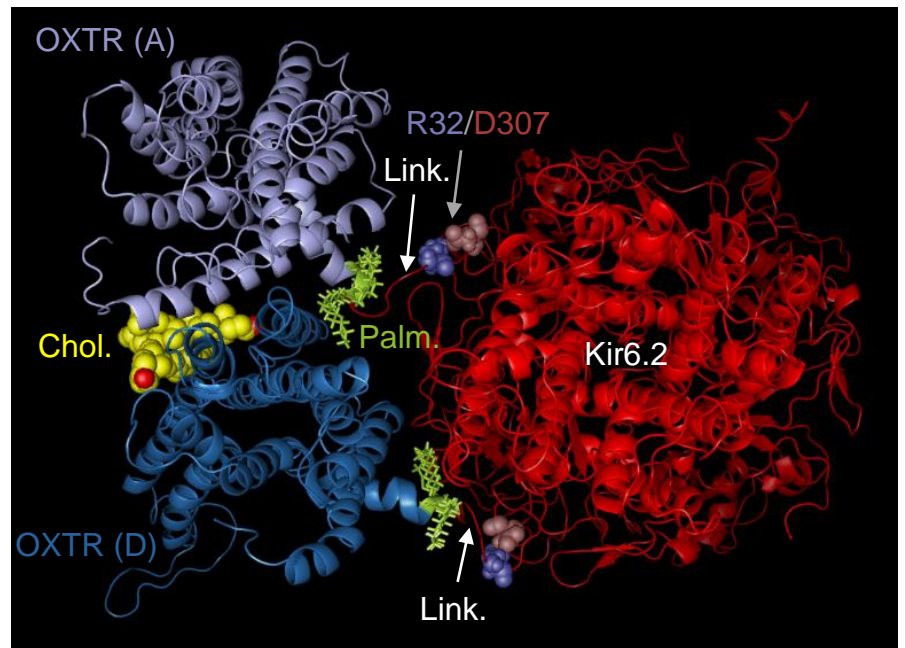

C)

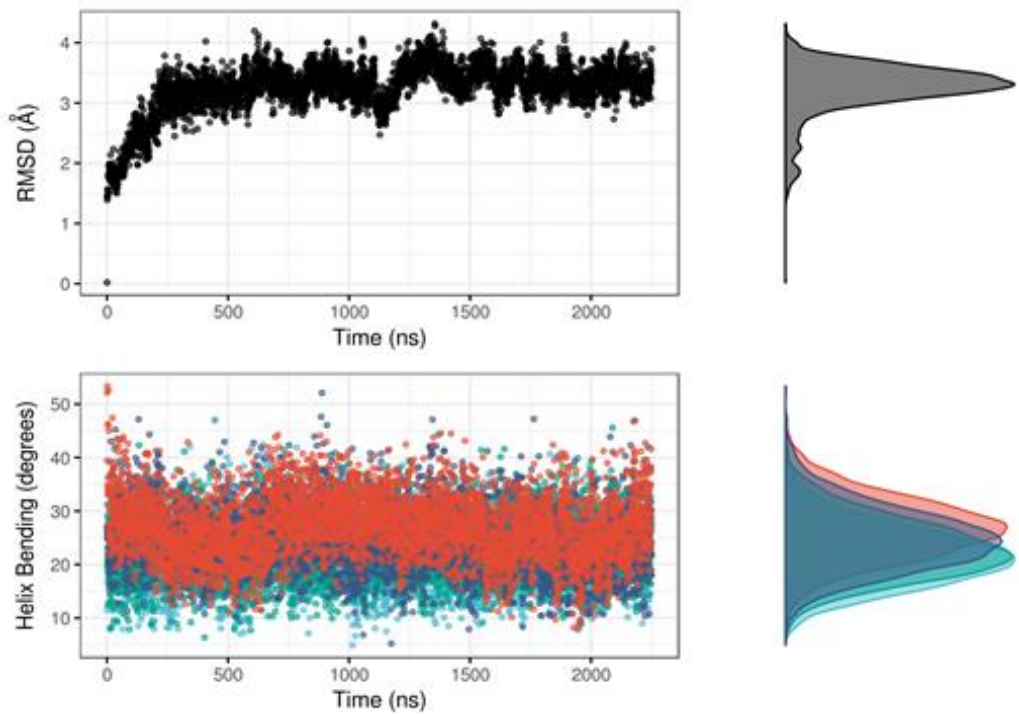

Supplement: mmc3.pdf [file mmc3.pdf]
